# Supplementary material for: Improving the governance of patient safety in emergency care: a systematic review of interventions
Source: HighWire-hosted journal article supplement (doi:10.1136/bmjopen-2015-009837), 2016-01-01
Supplement: bmjopen-2015-009837supp1.pdf [file bmjopen-2015-009837supp1.pdf]

## APPENDIX 1. SEARCH STRINGS, BY DATABASE

### Pubmed (July 3, 2014)

#### *Search strategy*

((((((((((clinical governance [mesh]) OR govern\* [tiab]) OR board [tiab]) OR director\* [tiab]) OR executive\* [tiab]) OR chair\* [tiab]) OR CEO [tiab])) AND (((((patient safety [mesh]) OR safety [tiab]) OR adverse event\* [tiab]) OR incident\* [tiab]) OR error\* [tiab]) OR harm [tiab])) AND (((((((((((((((emergency medical services [mesh]) OR emergency treatment [mesh]) OR traumatology [mesh]) OR after hours care [mesh]) OR emergency [tiab]) OR critical care [tiab]) OR trauma care [tiab]) OR acute\* [tiab]) OR out of hours\* [tiab]) OR acute psychiatric\* [tiab]) OR ambulances [mesh]) OR ambulance\* [tiab]) OR helicopter\* [tiab]) OR emergency transport [tiab]) OR (outpatient [tiab] AND (acute\* [tiab] OR emergency\* [tiab]))) OR (prehospital [tiab] AND (acute\* [tiab] OR emergency\* [tiab]))) AND (((((((((((((((risk management [mesh]) OR safety management [tiab]) OR risk management [tiab]) OR quality management [tiab]) OR intervention\* [tiab]) OR strategy [tiab]) OR strategies [tiab]) OR model [tiab]) OR models [tiab]) OR instrument\* [tiab]) OR monitor\* [tiab]) OR measur\* [tiab]) OR control\* [tiab]) OR oversight [tiab]) OR oversee\* [tiab])) OR (((((((((((((((((((safety culture [tiab]) OR safety climate [tiab]) OR culture of safety [tiab]) OR safety attitude\* [tiab]) OR leader\* [tiab]) OR balanced scorecard [tiab]) OR dashboard\* [tiab]) OR indicator\* [tiab]) OR audit\* [tiab]) OR walking round\* [tiab]) OR checklist\* [tiab]) OR protocol\* [tiab]) OR educat\* [tiab]) OR train\* [tiab]) OR incident report\* [tiab]) OR error report\* [tiab]) OR risk analys\* [tiab]) OR (information [tiab] AND technology [tiab])) OR (technical [tiab] AND system\* [tiab])) OR safety report\* [tiab]) OR adverse event report\* [tiab]) OR case report\* [tiab]) OR case analys\* [tiab]))

Hits: 1068

### CINAHL (July 3, 2014)

### *Search strategy*

((((MH "Clinical Governance+") OR AB govern\* OR AB board OR AB director\* OR AB executive\* OR AB chair\* OR AB CEO) AND ((MH "Patient Safety+") OR AB safety OR AB adverse event\* OR AB incident\* OR AB incident\* OR AB error\* OR AB harm) AND ((MH "Emergency Medical Services+") OR (MH "Emergency Treatment (Non-Cinahl)+") OR (MH "Emergency Medicine") OR (MH "Psychiatric Emergencies") OR (MH "Emergency Service+") OR (MH "Traumatology") OR (MH "Acute Care") OR AB emergency OR AB critical care OR AB trauma care OR AB acute\* OR AB out of hours OR (MH "Ambulances") OR AB ambulance\* OR AB helicopter\* OR AB emergency transport OR (AB outpatient) AND (AB acute\* AND AB emergency\*) OR (AB prehospital) AND (AB acute\* AND AB emergency\*)) AND ((MH "Risk Management+") OR (MH "Risk Assessment") OR AB safety management OR AB risk management OR AB quality management OR AB intervention\* OR AB strategy OR AB strategies OR AB model OR AB models OR AB educat\* OR AB protocol\* OR AB checklist\* OR AB walking round\* OR AB audit\* OR AB indicator\* OR AB dashboard\* OR AB balanced scorecard OR AB leader\* OR AB safety attitude\* OR AB culture of safety OR AB safety climate OR AB safety culture OR AB oversee\* OR AB oversight OR AB control\* OR AB measur\* OR AB monitor\* OR AB instrument\* OR AB case analys\* OR AB case report\* OR AB adverse event report\* OR AB safety report\* OR (AB technical) AND (AB system\*) OR (AB information) AND (AB technology) OR AB risk analys\* OR AB error report\* OR AB incident report\* OR AB train\*))

Hits: 406

### **Embase (July 3, 2014)**

#### *Search strategy*

((exp Clinical Governance/ OR govern\$.ab. OR board.ab. OR director\$.ab. OR executive\$.ab. OR chair\$.ab. OR CEO.ab.) AND (exp safety/ OR exp patient safety/ OR adverse event\$.ab. OR incident\$.ab.) AND (exp emergency care/ OR exp emergency medicine/ OR exp emergency ward/ OR exp emergency/ OR exp emergency health service/ OR exp emergency treatment/ OR exp

traumatology/ OR after hours.ab. OR out of hours.ab. OR acute psychiatric\$.ab. OR exp ambulance transportation/ OR exp ambulance/ OR helicopter\$.ab. OR emergency transport.ab.) AND (exp risk management/ OR exp intervention study/ OR strategy.ab. OR strategies.ab. OR instrument\$.ab. OR monitor\$.ab. OR oversight.ab. OR oversee\$.ab. OR safety culture.ab. OR safety climate.ab. OR culture of safety.ab. OR safety attitude\$.ab. OR leader\$.ab. OR balanced scorecard.ab. OR dashboard\$.ab. OR indicator\$.ab. OR audit\$.ab. OR checklist\$.ab. OR protocol\$.ab. OR educat\$.ab. OR incident report\$.ab. OR error report\$.ab. OR risk analys\$.ab. OR (information.ab. AND system\$.ab.) OR safety report\$.ab. OR adverse event report\$.ab. OR case analys\$.ab. OR walking round\$.ab. OR walk round.ab.))

Hits: 2541

### **Cochrane library (July 3, 2014)**

#### Search strategy

((govern\*:ti,ab,kw OR board:ti,ab,kw OR director\*:ti,ab,kw OR executive\*:ti,ab,kw OR chair\*:ti,ab,kw) AND (MeSH descriptor: [Patient Safety] explode all trees OR safety:ti,ab,kw OR adverse event\*:ti,ab,kw OR incident\*:ti,ab,kw OR error\*:ti,ab,kw OR harm:ti,ab,kw) AND (MeSH descriptor: [Emergency Medical Services] explode all trees OR MeSH descriptor: [Traumatology] explode all trees OR "emergency":ti,ab,kw OR acute care:ti,ab,kw OR trauma care:ti,ab,kw OR after-hours:ti,ab,kw OR acute psychiatric:ti,ab,kw OR MeSH descriptor: [Ambulances] explode all trees OR MeSH descriptor: [Air Ambulances] explode all trees OR "ambulance":ti,ab,kw OR helicopter\*:ti,ab,kw OR emergency transport:ti,ab,kw) AND (MeSH descriptor: [Risk Management] explode all trees OR MeSH descriptor: [Safety Management] explode all trees OR intervention management:ti,ab,kw OR intervention\*:ti,ab,kw OR strategy:ti,ab,kw OR strategies:ti,ab,kw OR model:ti,ab,kw OR models:ti,ab,kw OR instrument\*:ti,ab,kw OR monitor\*:ti,ab,kw OR measur\*:ti,ab,kw OR control\*:ti,ab,kw OR safety culture:ti,ab,kw OR safety climate:ti,ab,kw (Word variations have been searched) OR culture of safety:ti,ab,kw OR safety attitude\*:ti,ab,kw OR

leader\*:ti,ab,kw OR balanced scorecard:ti,ab,kw OR dashboard\*:ti,ab,kw OR indicator\*:ti,ab,kw OR  
audit\*:ti,ab,kw OR walking round:ti,ab,kw OR checklist\*:ti,ab,kw OR educat\*:ti,ab,kw OR  
train\*:ti,ab,kw OR incident report\*:ti,ab,kw OR risk analys\*:ti,ab,kw OR error report\*:ti,ab,kw OR  
information system:ti,ab,kw OR safety report\*:ti,ab,kw OR adverse event report\*:ti,ab,kw OR case  
report\*:ti,ab,kw OR case analys\*:ti,ab,kw))

Hits: 53

### **Psychinfo (July 3, 2014)**

#### *Search strategy*

((exp Clinical Governance/ OR govern\$.ab. OR board.ab. OR director\$.ab. OR executive\$.ab. OR  
chair\$.ab. OR CEO.ab.) AND (exp Safety/ OR adverse event\$.ab. OR incident\$.ab. OR error\$.ab. OR  
harm.ab.) AND (exp Emergency Services/ OR emergency.ab. OR trauma\$.ab. OR after hours.ab. OR  
out of hours.ab. OR acute\$.ab. OR critical care.ab. OR acute psychiatric\$.ab. OR ambulance\$.ab. OR  
helicopter\$.ab. OR emergency transport.ab. OR ((acute\$.ab. OR emergency\$.ab.) AND  
outpatient.ab.) OR ((acute\$.ab. OR emergency\$.ab.) AND prehospital.ab.)) AND (exp Risk  
Management/ OR exp Intervention/ OR intervention\$.ab. OR strategy.ab. OR strategies.ab. OR  
model.ab. OR models.ab. OR instrument\$.ab. OR monitor\$.ab. OR measur\$.ab. OR control\$.ab. OR  
oversight.ab. OR oversee\$.ab. OR safety culture.ab. OR safety climate.ab. OR culture of safety.ab. OR  
safety attitude\$.ab. OR exp Organizational Behavior/ OR exp Employee Attitudes/ OR exp  
Organizational Climate/ OR exp Management Personnel/ OR leader\$.ab. OR balanced scorecard.ab.  
OR dashboard\$.ab. OR indicator\$.ab. OR audit\$.ab. OR checklist\$.ab. OR protocol\$.ab. OR  
educat\$.ab. OR train\$.ab. OR incident report\$.ab. OR error report\$.ab. OR risk analys\$.ab. OR  
(information.ab. AND technology.ab.) OR (technical.ab. AND system\$.ab.) OR safety report\$.ab. OR  
adverse event report\$.ab. OR case report\$.ab. OR case analys\$.ab. OR walk round.ab.))

Hits: 219
